# Supplementary material for: Fast determination of fipronil and its metabolites in seafood using PRiME pass-through cleanup followed by isotope dilution UHPLC-MS/MS
Source: Royal Society of Chemistry journal article supplement (doi:10.1039/c8ay00445e), 2018-01-01
Supplement: c8ay00445e1.pdf [file c8ay00445e1.pdf]

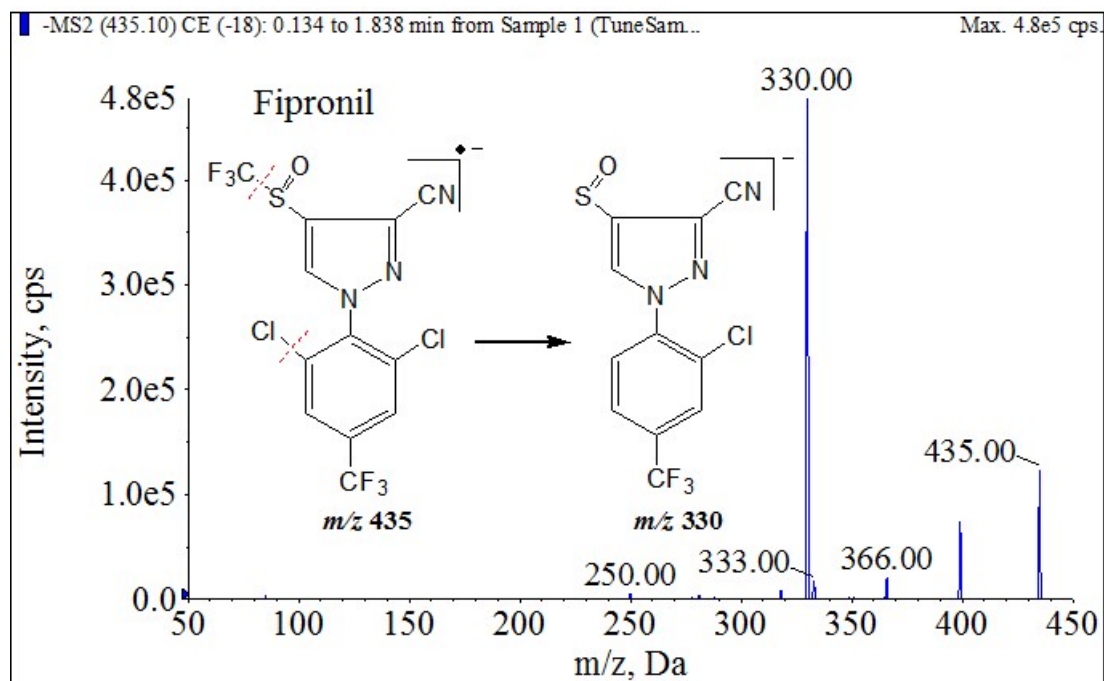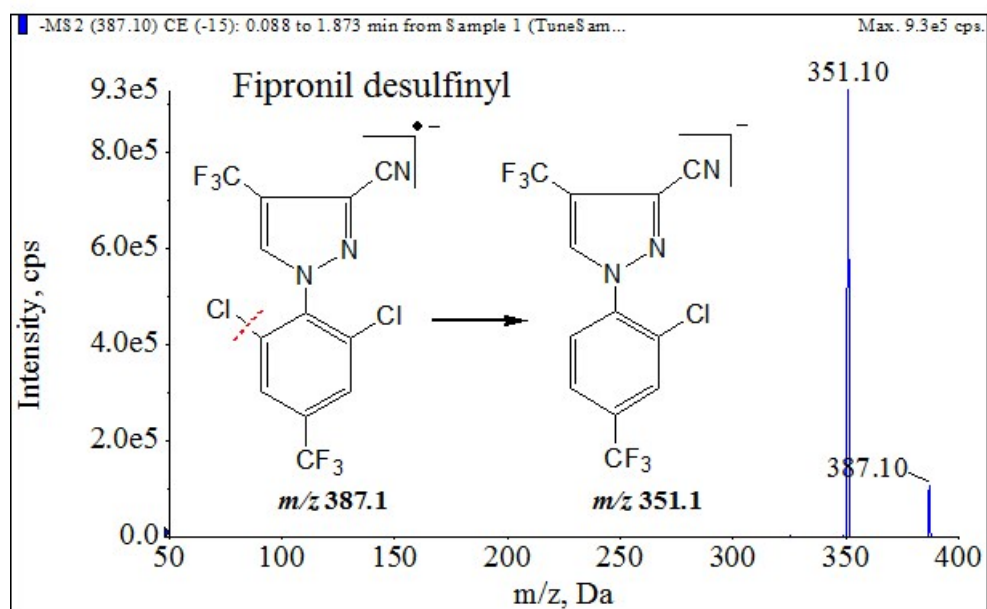

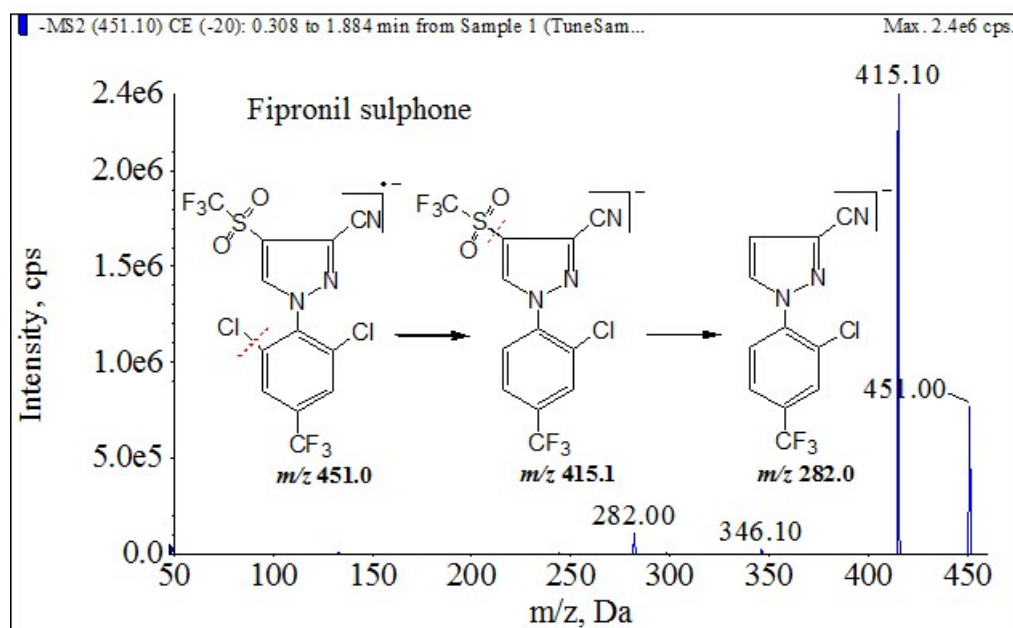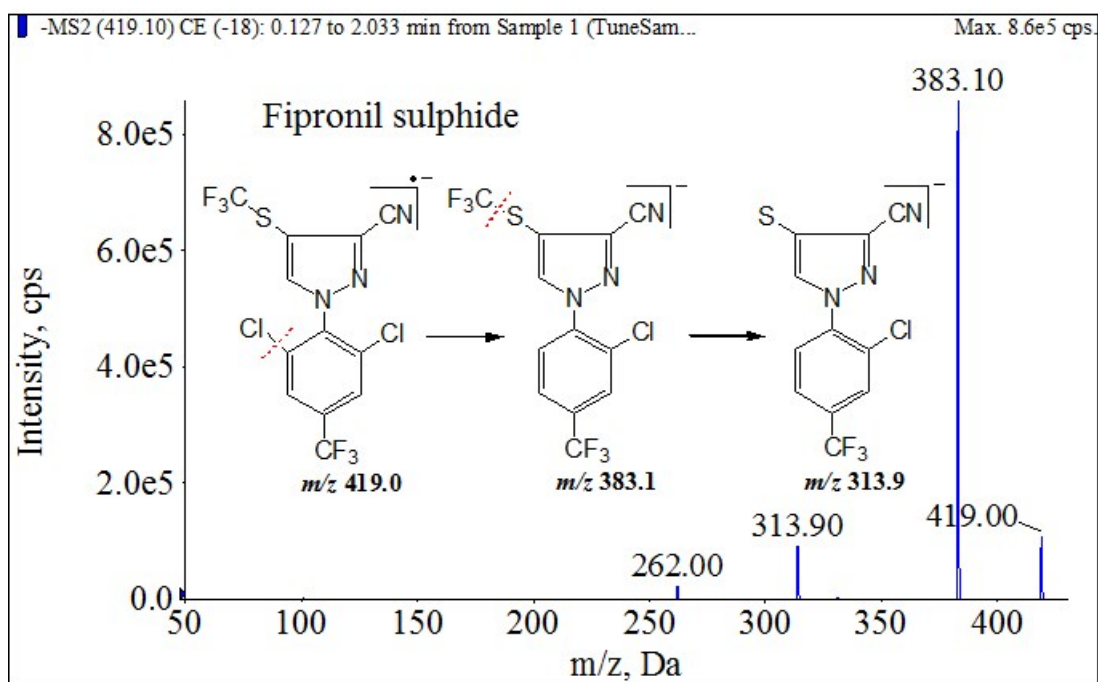

**Fig.S1.** The mass spectrums and proposed elimination paths of fipronil, fipronil desulfinyl, fipronil sulphone and fipronil sulphide.
